Development 137, 177 (2010) doi:10.1242/dev.047290

There was an error published in the online version of In This Issue, *Development* **136** (23).

The item '*Stem cell neuronal differentiation in mice and men*' incorrectly listed page 4053 and as such linked to the wrong paper.

It should have listed page 4055 and thereby been linked to the correct paper: Li, X.-J. et al. (2009). Coordination of sonic hedgehog and Wnt signaling determines ventral and dorsal telencephalic neuron types from human embryonic stem cells. *Development* **136**, 4055-4063.

The online version has now been corrected. The print copy is correct.

We apologise to authors and readers for this mistake.
